# Supplementary material
Source: PubMed Central journal article supplement (PMC7863645)
Supplement: CJN.12100720SupplementaryData.pdf [file CJN.12100720SupplementaryData.pdf]

## NHLBI Trans-Omics for Precision Medicine (TOPMed) Consortium

| Name                             | Institution(s)                                                              | Primary Department | Institution City | Institution State | Zip Code | Country |
|----------------------------------|-----------------------------------------------------------------------------|--------------------|------------------|-------------------|----------|---------|
| Abe, Namiko                      | New York<br>Genome<br>Center                                                |                    | New York         | New York          | 10013    | US      |
| Abecasis,<br>Gonçalo             | University of<br>Michigan                                                   |                    | Ann Arbor        | Michigan          | 48109    | US      |
| Aguet,<br>Francois               | Broad<br>Institute                                                          |                    |                  |                   |          |         |
| Albert,<br>Christine             | Brigham &<br>Women's<br>Hospital,<br>Cedars Sinai                           |                    | Boston           | Massachusetts     | 02114    | US      |
| Almasy, Laura                    | Children's<br>Hospital of<br>Philadelphia,<br>University of<br>Pennsylvania |                    | Philadelphia     | Pennsylvania      | 19104    | US      |
| Alonso, Alvaro                   | Emory<br>University                                                         |                    | Atlanta          | Georgia           | 30322    | US      |
| Ament, Seth                      | University of<br>Maryland                                                   |                    | Baltimore        | Maryland          | 21201    | US      |
| Anderson,<br>Peter               | University of<br>Washington                                                 |                    | Seattle          | Washington        | 98195    | US      |
| Anugu,<br>Pramod                 | University of<br>Mississippi                                                |                    | Jackson          | Mississippi       | 38677    | US      |
| Applebaum-<br>Bowden,<br>Deborah | National<br>Institutes of<br>Health                                         |                    | Bethesda         | Maryland          | 20892    | US      |
| Ardlie, Kristin                  | Broad<br>Institute                                                          |                    |                  |                   |          |         |
| Arking, Dan                      | Johns<br>Hopkins<br>University                                              |                    | Baltimore        | Maryland          | 21218    | US      |
| Arnett, Donna<br>K               | University of<br>Kentucky                                                   |                    | Lexington        | Kentucky          | 40506    | US      |
| Ashley-Koch,<br>Allison          | Duke<br>University                                                          |                    | Durham           | North<br>Carolina | 27708    | US      |
| Aslibekyan,<br>Stella            | University of<br>Alabama                                                    |                    | Birmingham       | Alabama           | 35487    | US      |

| <b>Name</b>             | <b>Institution(s)</b>                                                    | <b>Primary Department</b>    | <b>Institution City</b> | <b>Institution State</b> | <b>Zip Code</b> | <b>Country</b> |
|-------------------------|--------------------------------------------------------------------------|------------------------------|-------------------------|--------------------------|-----------------|----------------|
| Assimes, Tim            | Stanford University                                                      |                              | Stanford                | California               | 94305           | US             |
| Auer, Paul              | University of Wisconsin Milwaukee                                        |                              | Milwaukee               | Wisconsin                | 53211           | US             |
| Avramopoulos, Dimitrios | Johns Hopkins University                                                 |                              | Baltimore               | Maryland                 | 21218           | US             |
| Barnard, John           | Cleveland Clinic                                                         |                              | Cleveland               | Ohio                     | 44195           | US             |
| Barnes, Kathleen        | University of Colorado Anschutz Medical Campus                           |                              | Aurora                  | Colorado                 | 80045           | US             |
| Barr, R. Graham         | Columbia University                                                      |                              | New York                | New York                 | 10027           | US             |
| Barron-Casella, Emily   | Johns Hopkins University                                                 |                              | Baltimore               | Maryland                 | 21218           | US             |
| Barwick, Lucas          | The Emmes Corporation                                                    | LTRC                         | Rockville               | Maryland                 | 20850           | US             |
| Beaty, Terri            | Johns Hopkins University                                                 |                              | Baltimore               | Maryland                 | 21218           | US             |
| Beck, Gerald            | Cleveland Clinic                                                         | Quantitative Health Sciences | Cleveland               | Ohio                     | 44195           | US             |
| Becker, Diane           | Johns Hopkins University                                                 | Medicine                     | Baltimore               | Maryland                 | 21218           | US             |
| Becker, Lewis           | Johns Hopkins University                                                 |                              | Baltimore               | Maryland                 | 21218           | US             |
| Beer, Rebecca           | National Heart, Lung, and Blood Institute, National Institutes of Health |                              | Bethesda                | Maryland                 | 20892           | US             |
| Beitelshees,            | University of                                                            |                              | Baltimore               | Maryland                 | 21201           | US             |

| <b>Name</b>       | <b>Institution(s)</b>                                                                    | <b>Primary Department</b>                                   | <b>Institution City</b> | <b>Institution State</b> | <b>Zip Code</b> | <b>Country</b> |
|-------------------|------------------------------------------------------------------------------------------|-------------------------------------------------------------|-------------------------|--------------------------|-----------------|----------------|
| Amber             | Maryland<br>Boston                                                                       |                                                             |                         |                          |                 |                |
| Benjamin, Emelia  | University, Massachusetts General Hospital                                               | Boston University School of Medicine                        | Boston                  | Massachusetts            | 02118           | US             |
| Benos, Takis      | University of Pittsburgh<br>Fundação de Hematologia e Hemoterapia de Pernambuco - Hemope |                                                             |                         |                          |                 |                |
| Bezerra, Marcos   |                                                                                          |                                                             | Recife                  |                          | 52011-000       | BR             |
| Bielak, Larry     | University of Michigan                                                                   |                                                             | Ann Arbor               | Michigan                 | 48109           | US             |
| Bis, Joshua       | University of Washington                                                                 | Cardiovascular Health Research Unit, Department of Medicine | Seattle                 | Washington               | 98101           | US             |
| Blackwell, Thomas | University of Michigan                                                                   |                                                             | Ann Arbor               | Michigan                 | 48109           | US             |
| Blangero, John    | University of Texas Rio Grande Valley School of Medicine                                 | Human Genetics                                              | Brownsville             | Texas                    | 78520           | US             |
| Boerwinkle, Eric  | University of Texas Health at Houston                                                    |                                                             | Houston                 | Texas                    | 77225           | US             |
| Bowden, Donald W. | Wake Forest Baptist Health                                                               | Department of Biochemistry                                  | Winston-Salem           | North Carolina           | 27157           | US             |
| Bowler, Russell   | National Jewish Health                                                                   | National Jewish Health                                      | Denver                  | Colorado                 | 80206           | US             |
| Brody, Jennifer   | University of Washington                                                                 |                                                             | Seattle                 | Washington               | 98195           | US             |
| Broeckel, Ulrich  | Medical College of Wisconsin                                                             |                                                             | Milwaukee               | Wisconsin                | 53226           | US             |
| Broome, Jai       | University of                                                                            |                                                             | Seattle                 | Washington               | 98195           | US             |

| <b>Name</b>        | <b>Institution(s)</b>                   | <b>Primary Department</b>       | <b>Institution City</b> | <b>Institution State</b> | <b>Zip Code</b> | <b>Country</b> |
|--------------------|-----------------------------------------|---------------------------------|-------------------------|--------------------------|-----------------|----------------|
| Bunting, Karen     | Washington<br>New York<br>Genome Center |                                 | New York                | New York                 | 10013           | US             |
| Burchard, Esteban  | University of California, San Francisco |                                 | San Francisco           | California               | 94143           | US             |
| Bustamante, Carlos | Stanford University                     |                                 |                         |                          |                 | US             |
| Buth, Erin         | University of Washington                | Biostatistics                   | Seattle                 | Washington               | 98195           | US             |
| Cade, Brian        | Brigham & Women's Hospital              | Brigham and Women's Hospital    | Boston                  | Massachusetts            | 02115           | US             |
| Cardwell, Jonathan | University of Colorado at Denver        |                                 | Denver                  | Colorado                 | 80204           | US             |
| Carey, Vincent     | Brigham & Women's Hospital              |                                 |                         |                          |                 |                |
| Carty, Cara        | Washington State University             |                                 | Seattle                 | Washington               | 98109           | US             |
| Casaburi, Richard  | University of California, Los Angeles   |                                 | Los Angeles             | California               | 90095           | US             |
| Casella, James     | Johns Hopkins University                |                                 | Baltimore               | Maryland                 | 21218           | US             |
| Castaldi, Peter    | Brigham & Women's Hospital              | Medicine                        | Boston                  | Massachusetts            | 02111           | US             |
| Chaffin, Mark      | Broad Institute                         |                                 | Cambridge               | Massachusetts            | 02142           | US             |
| Chang, Christy     | University of Maryland                  |                                 | Baltimore               | Maryland                 | 21201           | US             |
| Chang, Yi-Cheng    | National Taiwan University              |                                 |                         |                          |                 |                |
| Chasman, Daniel    | Brigham & Women's                       | Division of Preventive Medicine | Boston                  | Massachusetts            | 02215           | US             |

| <b>Name</b>          | <b>Institution(s)</b>                        | <b>Primary Department</b>           | <b>Institution City</b> | <b>Institution State</b> | <b>Zip Code</b> | <b>Country</b> |
|----------------------|----------------------------------------------|-------------------------------------|-------------------------|--------------------------|-----------------|----------------|
| Chavan, Sameer       | Hospital<br>University of Colorado at Denver |                                     | Denver                  | Colorado                 | 80204           | US             |
| Chen, Bo-Juen        | New York<br>Genome Center                    |                                     | New York                | New York                 | 10013           | US             |
| Chen, Wei-Min        | University of Virginia                       |                                     | Charlottesville         | Virginia                 | 22903           | US             |
| Chen, Yii-Der<br>Ida | Lundquist Institute                          |                                     | Charlottesville         | Virginia                 | 90502           | US             |
| Cho, Michael         | Brigham &<br>Women's Hospital                |                                     | Boston                  | Massachusetts            | 02115           | US             |
| Choi, Seung<br>Hoan  | Broad Institute                              |                                     | Cambridge               | Massachusetts            | 02142           | US             |
| Chuang, Lee-Ming     | National Taiwan University                   | National Taiwan University Hospital | Taipei                  |                          | 10617           | TW             |
| Chung, Mina          | Cleveland Clinic                             | Cleveland Clinic                    | Cleveland               | Ohio                     | 44195           | US             |
| Chung, Ren-Hua       | National Health Research Institute Taiwan    |                                     |                         |                          |                 |                |
| Clish, Clary         | Broad Institute                              | Metabolomics Platform               | Cambridge               | Massachusetts            | 02142           | US             |
| Comhair, Suzy        | Cleveland Clinic                             | Immunity and Immunology             | Cleveland               | Ohio                     | 44195           | US             |
| Conomos, Matthew     | University of Washington                     | Biostatistics                       | Seattle                 | Washington               | 98115           | US             |
| Cornell, Elaine      | University of Vermont                        |                                     | Burlington              | Vermont                  | 05405           | US             |
| Correa, Adolfo       | University of Mississippi                    | Medicine                            | Jackson                 | Mississippi              | 39216           | US             |
| Crandall, Carolyn    | University of California, Los Angeles        |                                     | Los Angeles             | California               | 90095           | US             |
| Crapo, James         | National                                     |                                     | Denver                  | Colorado                 | 80206           | US             |

| <b>Name</b>          | <b>Institution(s)</b>                                       | <b>Primary Department</b>                       | <b>Institution City</b> | <b>Institution State</b> | <b>Zip Code</b> | <b>Country</b> |
|----------------------|-------------------------------------------------------------|-------------------------------------------------|-------------------------|--------------------------|-----------------|----------------|
| Cupples, L. Adrienne | Jewish Health<br>Boston University                          | Biostatistics                                   | Boston                  | Massachusetts            | 02118           | US             |
| Curran, Joanne       | University of Texas Rio Grande<br>Valley School of Medicine |                                                 | Brownsville             | Texas                    | 78520           | US             |
| Curtis, Jeffrey      | University of Michigan                                      |                                                 | Ann Arbor               | Michigan                 | 48109           | US             |
| Custer, Brian        | Vitalant<br>Research Institute                              |                                                 | San Francisco           | California               | 94118           | US             |
| Damcott, Coleen      | University of Maryland                                      |                                                 | Baltimore               | Maryland                 | 21201           | US             |
| Darbar, Dawood       | University of Illinois at Chicago                           |                                                 | Chicago                 | Illinois                 | 60607           | US             |
| Das, Sayantan        | University of Michigan                                      |                                                 | Ann Arbor               | Michigan                 | 48109           | US             |
| David, Sean          | University of Chicago                                       |                                                 |                         | Illinois                 |                 | US             |
| Davis, Colleen       | University of Washington                                    |                                                 | Seattle                 | Washington               | 98195           | US             |
| Daya, Michelle       | University of Colorado at Denver                            |                                                 | Denver                  | Colorado                 | 80204           | US             |
| de Andrade, Mariza   | Mayo Clinic                                                 | Health Sciences Research                        | Rochester               | Minnesota                | 55905           | US             |
| de las Fuentes, Lisa | Washington University in St Louis                           | Department of Medicine, Cardiovascular Division | St. Louis               | Missouri                 | 63110           | US             |
| DeBaun, Michael      | Vanderbilt University                                       |                                                 | Nashville               | Tennessee                | 37235           | US             |
| Deka, Ranjan         | University of Cincinnati                                    |                                                 | Cincinnati              | Ohio                     | 45220           | US             |
| DeMeo, Dawn          | Brigham & Women's Hospital                                  |                                                 | Boston                  | Massachusetts            | 02115           | US             |

| <b>Name</b>         | <b>Institution(s)</b>                                    | <b>Primary Department</b>                | <b>Institution City</b> | <b>Institution State</b> | <b>Zip Code</b> | <b>Country</b> |
|---------------------|----------------------------------------------------------|------------------------------------------|-------------------------|--------------------------|-----------------|----------------|
| Devine, Scott       | University of Maryland                                   |                                          | Baltimore               | Maryland                 | 21201           | US             |
| Duan, Qing          | University of North Carolina                             |                                          | Chapel Hill             | North Carolina           | 27599           | US             |
| Duggirala, Ravi     | University of Texas Rio Grande Valley School of Medicine |                                          | Edinburg                | Texas                    | 78539           | US             |
| Durda, Jon Peter    | University of Vermont                                    |                                          | Burlington              | Vermont                  | 05405           | US             |
| Dutcher, Susan      | Washington University in St Louis                        |                                          | St Louis                | Missouri                 | 63130           | US             |
| Eaton, Charles      | Brown University                                         |                                          | Providence              | Rhode Island             | 02912           | US             |
| Ekunwe, Lynette     | University of Mississippi                                |                                          | Jackson                 | Mississippi              | 38677           | US             |
| El Boueiz, Adel     | Harvard University                                       | Channing Division of Network Medicine    | Boston                  | Massachusetts            | 02115           | US             |
| Ellinor, Patrick    | Massachusetts General Hospital                           |                                          | Boston                  | Massachusetts            | 02114           | US             |
| Emery, Leslie       | University of Washington                                 |                                          | Seattle                 | Washington               | 98195           | US             |
| Erzurum, Serpil     | Cleveland Clinic                                         |                                          | Cleveland               | Ohio                     | 44195           |                |
| Farber, Charles     | University of Virginia                                   |                                          | Charlottesville         | Virginia                 | 22903           | US             |
| Fingerlin, Tasha    | National Jewish Health                                   | Center for Genes, Environment and Health | Denver                  | Colorado                 | 80206           | US             |
| Flickinger, Matthew | University of Michigan                                   |                                          | Ann Arbor               | Michigan                 | 48109           | US             |
| Fornage, Myriam     | University of Texas Health at Houston                    |                                          | Houston                 | Texas                    | 77225           | US             |
| Franceschini, Nora  | University of North Carolina                             | Epidemiology                             | Chapel Hill             | North Carolina           | 27599           | US             |

| <b>Name</b>              | <b>Institution(s)</b>                                                    | <b>Primary Department</b> | <b>Institution City</b> | <b>Institution State</b> | <b>Zip Code</b> | <b>Country</b> |
|--------------------------|--------------------------------------------------------------------------|---------------------------|-------------------------|--------------------------|-----------------|----------------|
| Frazar, Chris            | University of Washington                                                 |                           |                         |                          |                 |                |
| Fu, Mao                  | University of Maryland                                                   |                           | Baltimore               | Maryland                 | 21201           | US             |
| Fullerton, Stephanie M.  | University of Washington                                                 |                           | Seattle                 | Washington               | 98195           | US             |
| Fulton, Lucinda          | Washington University in St Louis                                        |                           | St Louis                | Missouri                 | 63130           | US             |
| Gabriel, Stacey          | Broad Institute                                                          |                           | Cambridge               | Massachusetts            | 02142           | US             |
| Gan, Weiniu              | National Heart, Lung, and Blood Institute, National Institutes of Health |                           | Bethesda                | Maryland                 | 20892           | US             |
| Gao, Shanshan            | University of Colorado at Denver                                         |                           |                         |                          |                 | US             |
| Gao, Yan                 | University of Mississippi                                                |                           | Jackson                 | Mississippi              | 38677           | US             |
| Gass, Margery            | Fred Hutchinson Cancer Research Center                                   |                           | Seattle                 | Washington               | 98109           | US             |
| Gelb, Bruce              | Icahn School of Medicine at Mount Sinai                                  |                           | New York                | New York                 | 10029           | US             |
| Geng, Xiaoqi (Priscilla) | University of Michigan                                                   |                           | Ann Arbor               | Michigan                 | 48109           | US             |
| Geraci, Mark             | Indiana University                                                       | Medicine                  | Indianapolis            | Indiana                  | 46202           | US             |
| Germer, Soren            | New York Genome Center                                                   |                           | New York                | New York                 | 10013           | US             |
| Gerszten, Robert         | Beth Israel Deaconess                                                    |                           |                         |                          |                 |                |



| <b>Name</b>         | <b>Institution(s)</b>                                        | <b>Primary Department</b> | <b>Institution City</b> | <b>Institution State</b> | <b>Zip Code</b> | <b>Country</b> |
|---------------------|--------------------------------------------------------------|---------------------------|-------------------------|--------------------------|-----------------|----------------|
| Ghosh, Auyon        | Medical Center<br>Brigham & Women's Hospital                 |                           |                         |                          |                 | US             |
| Gibbs, Richard      | Baylor College of Medicine<br>Human Genome Sequencing Center |                           |                         |                          |                 |                |
| Gignoux, Chris      | Stanford University                                          |                           | Stanford                | California               | 94305           | US             |
| Gladwin, Mark       | University of Pittsburgh                                     |                           | Pittsburgh              | Pennsylvania             | 15260           | US             |
| Glahn, David        | Yale University                                              |                           | New Haven               | Connecticut              | 06520           | US             |
| Gogarten, Stephanie | University of Washington                                     |                           | Seattle                 | Washington               | 98195           | US             |
| Gong, Da-Wei        | University of Maryland                                       |                           | Baltimore               | Maryland                 | 21201           | US             |
| Goring, Harald      | University of Texas Rio Grande<br>Valley School of Medicine  |                           | San Antonio             | Texas                    | 78229           | US             |
| Graw, Sharon        | University of Colorado<br>Anschutz Medical Campus            |                           |                         |                          |                 |                |
| Grine, Daniel       | University of Colorado at Denver                             |                           |                         |                          |                 | US             |
| Gu, C. Charles      | Washington University in St Louis                            |                           | St Louis                | Missouri                 | 63130           | US             |
| Guan, Yue           | University of Maryland                                       |                           | Baltimore               | Maryland                 | 21201           | US             |
| Guo, Xiuqing        | Lundquist                                                    |                           | Los Angeles             | California               | 90502           | US             |

| <b>Name</b>       | <b>Institution(s)</b>                                                  | <b>Primary Department</b>                        | <b>Institution City</b> | <b>Institution State</b> | <b>Zip Code</b> | <b>Country</b> |
|-------------------|------------------------------------------------------------------------|--------------------------------------------------|-------------------------|--------------------------|-----------------|----------------|
| Gupta, Namrata    | Institute<br>Broad<br>Institute                                        |                                                  |                         |                          |                 |                |
| Haessler, Jeff    | Fred<br>Hutchinson<br>Cancer<br>Research<br>Center                     |                                                  | Seattle                 | Washington               | 98109           | US             |
| Hall, Michael     | University of<br>Mississippi                                           |                                                  | Jackson                 | Mississippi              | 38677           | US             |
| Harris, Daniel    | University of<br>Maryland                                              |                                                  | Baltimore               | Maryland                 | 21201           | US             |
| Hawley, Nicola L. | Yale<br>University                                                     | Department of<br>Chronic Disease<br>Epidemiology | New Haven               | Connecticut              | 06520           | US             |
| He, Jiang         | Tulane<br>University                                                   |                                                  | New Orleans             | Louisiana                | 70118           | US             |
| Heavner, Ben      | University of<br>Washington                                            | Biostatistics                                    | Seattle                 | Washington               | 98195           | US             |
| Heckbert, Susan   | University of<br>Washington                                            |                                                  | Seattle                 | Washington               | 98195           | US             |
| Hernandez, Ryan   | McGill<br>University,<br>University of<br>California,<br>San Francisco |                                                  |                         |                          |                 | CA             |
| Herrington, David | Wake Forest<br>Baptist Health                                          |                                                  | Winston-<br>Salem       | North<br>Carolina        | 27157           | US             |
| Hersh, Craig      | Brigham &<br>Women's<br>Hospital                                       | Channing Division of<br>Network Medicine         | Boston                  | Massachusetts            | 02115           | US             |
| Hidalgo, Bertha   | University of<br>Alabama                                               |                                                  | Birmingham              | Alabama                  | 35487           | US             |
| Hixson, James     | University of<br>Texas Health<br>at Houston                            |                                                  | Houston                 | Texas                    | 77225           | US             |
| Hobbs, Brian      | Brigham &<br>Women's<br>Hospital                                       |                                                  |                         |                          |                 |                |
| Hokanson, John    | University of<br>Colorado at                                           |                                                  | Denver                  | Colorado                 | 80204           | US             |

| <b>Name</b>            | <b>Institution(s)</b>                                                       | <b>Primary Department</b>                                             | <b>Institution City</b> | <b>Institution State</b> | <b>Zip Code</b> | <b>Country</b> |
|------------------------|-----------------------------------------------------------------------------|-----------------------------------------------------------------------|-------------------------|--------------------------|-----------------|----------------|
| Hong, Elliott          | Denver<br>University of Maryland                                            |                                                                       | Baltimore               | Maryland                 | 21201           | US             |
| Hoth, Karin            | University of Iowa                                                          |                                                                       | Iowa City               | Iowa                     | 52242           | US             |
| Hsiung, Chao (Agnes)   | National Health Research Institute<br>Taiwan                                | Institute of Population Health Sciences, NHRI                         | Miaoli County           |                          | 350             | TW             |
| Hung, Yi-Jen           | Tri-Service General Hospital<br>National Defense Medical Center             |                                                                       |                         |                          |                 | US             |
| Huston, Haley          | Blood Works Northwest                                                       |                                                                       | Seattle                 | Washington               | 98105           | US             |
| Hwu, Chii Min          | Taichung Veterans General Hospital<br>Taiwan                                |                                                                       | Taichung City           |                          | 407             | TW             |
| Irvin, Marguerite Ryan | University of Alabama                                                       |                                                                       | Birmingham              | Alabama                  | 35487           | US             |
| Jackson, Rebecca       | Ohio State University<br>Wexner Medical Center                              | Internal Medicine, Division of Endocrinology, Diabetes and Metabolism | Columbus                | Ohio                     | 43210           | US             |
| Jain, Deepti           | University of Washington                                                    |                                                                       | Seattle                 | Washington               | 98195           | US             |
| Jaquish, Cashell       | National Heart, Lung, and Blood Institute,<br>National Institutes of Health |                                                                       | Bethesda                | Maryland                 | 20892           | US             |
| Jhun, Min A            | University of                                                               |                                                                       | Ann Arbor               | Michigan                 | 48109           | US             |

| <b>Name</b>       | <b>Institution(s)</b>                                                    | <b>Primary Department</b> | <b>Institution City</b> | <b>Institution State</b> | <b>Zip Code</b> | <b>Country</b> |
|-------------------|--------------------------------------------------------------------------|---------------------------|-------------------------|--------------------------|-----------------|----------------|
| Johnsen, Jill     | Michigan Blood Works Northwest, University of Washington                 |                           | Seattle                 | Washington               | 98102           | US             |
| Johnson, Andrew   | National Heart, Lung, and Blood Institute, National Institutes of Health |                           | Bethesda                | Maryland                 | 20892           | US             |
| Johnson, Craig    | University of Washington                                                 |                           | Seattle                 | Washington               | 98195           | US             |
| Johnston, Rich    | Emory University                                                         |                           | Atlanta                 | Georgia                  | 30322           | US             |
| Jones, Kimberly   | Johns Hopkins University                                                 |                           | Baltimore               | Maryland                 | 21218           | US             |
| Kang, Hyun Min    | University of Michigan                                                   | Biostatistics             | Ann Arbor               | Michigan                 | 48109           | US             |
| Kaplan, Robert    | Albert Einstein College of Medicine                                      |                           | New York                | New York                 | 10461           | US             |
| Kardia, Sharon    | University of Michigan                                                   |                           | Ann Arbor               | Michigan                 | 48109           | US             |
| Kathiresan, Sekar | Broad Institute                                                          |                           | Cambridge               | Massachusetts            | 02142           | US             |
| Kelly, Shannon    | Vitalant Research Institute                                              |                           | San Francisco           | California               | 94118           | US             |
| Kenny, Eimear     | Icahn School of Medicine at Mount Sinai                                  |                           | New York                | New York                 | 10029           | US             |
| Kessler, Michael  | University of Maryland                                                   |                           | Baltimore               | Maryland                 | 21201           | US             |
| Khan, Alyna       | University of Washington                                                 |                           | Seattle                 | Washington               | 98195           | US             |
| Kim, Wonji        | Harvard                                                                  |                           |                         |                          |                 | US             |

| <b>Name</b>          | <b>Institution(s)</b>                     | <b>Primary Department</b> | <b>Institution City</b> | <b>Institution State</b> | <b>Zip Code</b> | <b>Country</b> |
|----------------------|-------------------------------------------|---------------------------|-------------------------|--------------------------|-----------------|----------------|
| Kinney, Greg         | University of Colorado at Denver          |                           | Denver                  | Colorado                 | 80204           | US             |
| Konkle, Barbara      | Blood Works Northwest                     |                           | Seattle                 | Washington               | 98104           | US             |
| Kooperberg, Charles  | Fred Hutchinson Cancer Research Center    |                           | Seattle                 | Washington               | 98109           | US             |
| Kramer, Holly        | Loyola University                         | Public Health Sciences    | Maywood                 | Illinois                 | 60153           | US             |
| Lange, Christoph     | Harvard School of Public Health           | Biostats                  | Boston                  | Massachusetts            | 02115           | US             |
| Lange, Ethan         | University of Colorado at Denver          |                           | Denver                  | Colorado                 | 80204           | US             |
| Lange, Leslie        | University of Colorado at Denver          |                           | Denver                  | Colorado                 | 80204           | US             |
| Laurie, Cathy        | University of Washington                  |                           | Seattle                 | Washington               | 98195           | US             |
| Laurie, Cecelia      | University of Washington                  |                           | Seattle                 | Washington               | 98195           | US             |
| LeBoff, Meryl        | Brigham & Women's Hospital                |                           | Boston                  | Massachusetts            | 02115           | US             |
| Lee, Jiwon           | Brigham & Women's Hospital                |                           |                         |                          |                 |                |
| Lee, Seunggeun Shawn | University of Michigan                    |                           | Ann Arbor               | Michigan                 | 48109           | US             |
| Lee, Wen-Jane        | Taichung Veterans General Hospital Taiwan |                           | Taichung City           |                          | 407             | TW             |
| LeFaive,             | University of                             |                           | Ann Arbor               | Michigan                 | 48109           | US             |

| <b>Name</b>      | <b>Institution(s)</b>                                                    | <b>Primary Department</b>                                | <b>Institution City</b> | <b>Institution State</b> | <b>Zip Code</b> | <b>Country</b> |
|------------------|--------------------------------------------------------------------------|----------------------------------------------------------|-------------------------|--------------------------|-----------------|----------------|
| Jonathon         | Michigan                                                                 |                                                          |                         |                          |                 |                |
| Levine, David    | University of Washington                                                 |                                                          | Seattle                 | Washington               | 98195           | US             |
| Levy, Dan        | National Heart, Lung, and Blood Institute, National Institutes of Health |                                                          | Bethesda                | Maryland                 | 20892           | US             |
| Lewis, Joshua    | University of Maryland                                                   |                                                          | Baltimore               | Maryland                 | 21201           | US             |
| Li, Xiaohui      | Lundquist Institute                                                      |                                                          |                         |                          |                 |                |
| Li, Yun          | University of North Carolina                                             |                                                          | Chapel Hill             | North Carolina           | 27599           | US             |
| Lin, Henry       | Lundquist Institute                                                      |                                                          |                         |                          |                 |                |
| Lin, Honghuang   | Boston University                                                        |                                                          | Boston                  | Massachusetts            | 02215           | US             |
| Lin, Keng Han    | University of Michigan                                                   |                                                          | Ann Arbor               | Michigan                 | 48109           | US             |
| Lin, Xihong      | Harvard School of Public Health                                          |                                                          |                         |                          |                 |                |
| Liu, Simin       | Brown University                                                         | Epidemiology and Medicine                                | Providence              | Rhode Island             | 02912           | US             |
| Liu, Yongmei     | Duke University                                                          | Cardiology                                               | Durham                  | North Carolina           | 27701           | US             |
| Liu, Yu          | Stanford University                                                      | Cardiovascular Institute                                 | Palo Alto               | California               | 94305           | US             |
| Loos, Ruth J.F.  | Icahn School of Medicine at Mount Sinai                                  | The Charles Bronfman Institute for Personalized Medicine | New York                | New York                 | 10029           | US             |
| Lubitz, Steven   | Massachusetts General Hospital                                           |                                                          | Boston                  | Massachusetts            | 02114           | US             |
| Lunetta, Kathryn | Boston University                                                        |                                                          | Boston                  | Massachusetts            | 02215           | US             |

| <b>Name</b>          | <b>Institution(s)</b>                                                    | <b>Primary Department</b> | <b>Institution City</b> | <b>Institution State</b> | <b>Zip Code</b> | <b>Country</b> |
|----------------------|--------------------------------------------------------------------------|---------------------------|-------------------------|--------------------------|-----------------|----------------|
| Luo, James           | National Heart, Lung, and Blood Institute, National Institutes of Health |                           | Bethesda                | Maryland                 | 20892           | US             |
| Mahaney, Michael     | University of Texas Rio Grande Valley School of Medicine                 |                           | Brownsville             | Texas                    | 78520           | US             |
| Make, Barry          | Johns Hopkins University                                                 |                           | Baltimore               | Maryland                 | 21218           | US             |
| Manichaikul, Ani     | University of Virginia                                                   |                           | Charlottesville         | Virginia                 | 22903           | US             |
| Manson, JoAnn        | Brigham & Women's Hospital                                               |                           | Boston                  | Massachusetts            | 02115           | US             |
| Margolin, Lauren     | Broad Institute                                                          |                           | Cambridge               | Massachusetts            | 02142           | US             |
| Martin, Lisa         | George Washington University                                             |                           | Washington              | District of Columbia     | 20052           | US             |
| Mathai, Susan        | University of Colorado at Denver                                         |                           | Denver                  | Colorado                 | 80204           | US             |
| Mathias, Rasika      | Johns Hopkins University                                                 |                           | Baltimore               | Maryland                 | 21218           | US             |
| May, Susanne         | University of Washington                                                 | Biostatistics             | Seattle                 | Washington               | 98195-9461      | US             |
| McArdle, Patrick     | University of Maryland                                                   |                           | Baltimore               | Maryland                 | 21201           | US             |
| McDonald, Merry-Lynn | University of Alabama                                                    |                           | Birmingham              | Alabama                  | 35487           | US             |
| McFarland, Sean      | Harvard University                                                       |                           | Cambridge               | Massachusetts            | 02138           | US             |
| McGarvey, Stephen    | Brown University                                                         |                           | Providence              | Rhode Island             | 02912           | US             |

| <b>Name</b>          | <b>Institution(s)</b>                                                    | <b>Primary Department</b> | <b>Institution City</b> | <b>Institution State</b> | <b>Zip Code</b> | <b>Country</b> |
|----------------------|--------------------------------------------------------------------------|---------------------------|-------------------------|--------------------------|-----------------|----------------|
| McGoldrick, Daniel   | University of Washington                                                 |                           |                         |                          |                 |                |
| McHugh, Caitlin      | University of Washington                                                 | Biostatistics             | Seattle                 | Washington               | 98145           | US             |
| Mei, Hao             | University of Mississippi                                                |                           | Jackson                 | Mississippi              | 38677           | US             |
| Mestroni, Luisa      | University of Colorado Anschutz Medical Campus                           |                           |                         |                          |                 |                |
| Meyers, Deborah A    | University of Arizona                                                    |                           | Tucson                  | Arizona                  | 85721           | US             |
| Mikulla, Julie       | National Heart, Lung, and Blood Institute, National Institutes of Health |                           | Bethesda                | Maryland                 | 20892           | US             |
| Min, Nancy           | University of Mississippi National Heart, Lung, and Blood                |                           | Jackson                 | Mississippi              | 38677           | US             |
| Minear, Mollie       | Institute, National Institutes of Health                                 |                           | Bethesda                | Maryland                 | 20892           | US             |
| Minster, Ryan L      | University of Pittsburgh                                                 |                           | Pittsburgh              | Pennsylvania             | 15260           | US             |
| Mitchell, Braxton D. | University of Maryland                                                   |                           | Baltimore               | Maryland                 | 21201           | US             |
| Moll, Matt           | Brigham & Women's Hospital                                               | Medicine                  | Boston                  | Massachusetts            | 02115           | US             |
| Montasser, May E.    | University of Maryland                                                   |                           | Baltimore               | Maryland                 | 21201           | US             |
| Montgomery, Courtney | Oklahoma Medical Research                                                | Genes and Human Disease   | Oklahoma City           | Oklahoma                 | 73104           | US             |



| <b>Name</b>             | <b>Institution(s)</b>                                                                 | <b>Primary Department</b> | <b>Institution City</b> | <b>Institution State</b> | <b>Zip Code</b> | <b>Country</b> |
|-------------------------|---------------------------------------------------------------------------------------|---------------------------|-------------------------|--------------------------|-----------------|----------------|
| Moscato, Arden          | Foundation<br>Icahn School<br>of Medicine<br>at Mount<br>Sinai                        |                           |                         |                          |                 |                |
| Musani,<br>Solomon      | University of<br>Mississippi                                                          | Medicine                  | Jackson                 | Mississippi              | 39213           | US             |
| Mwasongwe,<br>Stanford  | University of<br>Mississippi                                                          |                           | Jackson                 | Mississippi              | 38677           | US             |
| Mychaleckyj,<br>Josyf C | University of<br>Virginia                                                             |                           | Charlottesville         | Virginia                 | 22903           | US             |
| Nadkarni,<br>Girish     | Icahn School<br>of Medicine<br>at Mount<br>Sinai                                      |                           | New York                | New York                 | 10029           | US             |
| Naik, Rakhi             | Johns<br>Hopkins<br>University                                                        |                           | Baltimore               | Maryland                 | 21218           | US             |
| Naseri, Take            | Ministry of<br>Health,<br>Government<br>of Samoa                                      |                           | Apia                    |                          |                 | WS             |
| Natarajan,<br>Pradeep   | Broad<br>Institute,<br>Harvard<br>University,<br>Massachusetts<br>General<br>Hospital |                           | Cambridge               | Massachusetts            | 02138           | US             |
| Nekhai, Sergei          | Howard<br>University                                                                  |                           | Washington              | District of<br>Columbia  | 20059           | US             |
| Nelson, Sarah<br>C.     | University of<br>Washington                                                           | Biostatistics             | Seattle                 | Washington               | 98195           | US             |
| Neltner,<br>Bonnie      | University of<br>Colorado at<br>Denver                                                |                           |                         |                          |                 | US             |
| Nickerson,<br>Deborah   | University of<br>Washington                                                           |                           | Seattle                 | Washington               | 98195           | US             |
| North, Kari             | University of<br>North<br>Carolina                                                    |                           | Chapel Hill             | North<br>Carolina        | 27599           | US             |

| <b>Name</b>          | <b>Institution(s)</b>                                                    | <b>Primary Department</b>         | <b>Institution City</b> | <b>Institution State</b> | <b>Zip Code</b> | <b>Country</b> |
|----------------------|--------------------------------------------------------------------------|-----------------------------------|-------------------------|--------------------------|-----------------|----------------|
| O'Connell, Jeff      | University of Maryland                                                   |                                   | Baltimore               | Maryland                 | 21201           | US             |
| O'Connor, Tim        | University of Maryland                                                   |                                   | Baltimore               | Maryland                 | 21201           | US             |
| Ochs-Balcom, Heather | University at Buffalo                                                    |                                   | Buffalo                 | New York                 | 14260           | US             |
| Paik, David          | Stanford University                                                      | Stanford Cardiovascular Institute | Stanford                | California               | 94304           | US             |
| Palmer, Nicholette   | Wake Forest Baptist Health                                               | Biochemistry                      | Winston-Salem           | North Carolina           | 27157           | US             |
| Pankow, James        | University of Minnesota                                                  |                                   | Minneapolis             | Minnesota                | 55455           | US             |
| Papanicolaou, George | National Heart, Lung, and Blood Institute, National Institutes of Health |                                   | Bethesda                | Maryland                 | 20892           | US             |
| Parsa, Afshin        | University of Maryland                                                   |                                   | Baltimore               | Maryland                 | 21201           | US             |
| Peralta, Juan Manuel | University of Texas Rio Grande Valley School of Medicine                 |                                   | Edinburg                | Texas                    | 78539           | US             |
| Perez, Marco         | Stanford University                                                      |                                   | Stanford                | California               | 94305           | US             |
| Perry, James         | University of Maryland                                                   |                                   | Baltimore               | Maryland                 | 21201           | US             |
| Peters, Ulrike       | Fred Hutchinson Cancer Research Center, University of Washington         |                                   | Seattle                 | Washington               | 98109           | US             |
| Peyser, Patricia     | University of Michigan                                                   |                                   | Ann Arbor               | Michigan                 | 48109           | US             |
| Phillips,            | Emory                                                                    |                                   | Atlanta                 | Georgia                  | 30322           | US             |

| <b>Name</b>             | <b>Institution(s)</b>                                                    | <b>Primary Department</b> | <b>Institution City</b> | <b>Institution State</b> | <b>Zip Code</b> | <b>Country</b> |
|-------------------------|--------------------------------------------------------------------------|---------------------------|-------------------------|--------------------------|-----------------|----------------|
| Lawrence S              | University                                                               |                           |                         |                          |                 |                |
| Pollin, Toni            | University of Maryland                                                   |                           | Baltimore               | Maryland                 | 21201           | US             |
| Post, Wendy             | Johns Hopkins University                                                 | Cardiology/Medicine       | Baltimore               | Maryland                 | 21218           | US             |
| Powers Becker, Julia    | University of Colorado at Denver                                         | Medicine                  | Denver                  | Colorado                 | 80204           | US             |
| Preethi Boorgula, Meher | University of Colorado at Denver                                         |                           | Denver                  | Colorado                 | 80204           | US             |
| Preuss, Michael         | Icahn School of Medicine at Mount Sinai                                  |                           | New York                | New York                 | 10029           | US             |
| Psaty, Bruce            | University of Washington                                                 |                           | Seattle                 | Washington               | 98195           | US             |
| Qasba, Pankaj           | National Heart, Lung, and Blood Institute, National Institutes of Health |                           | Bethesda                | Maryland                 | 20892           | US             |
| Qiao, Dandi             | Brigham & Women's Hospital                                               |                           | Boston                  | Massachusetts            | 02115           | US             |
| Qin, Zhaohui            | Emory University                                                         |                           | Atlanta                 | Georgia                  | 30322           | US             |
| Rafaels, Nicholas       | University of Colorado at Denver                                         |                           | Denver                  | Colorado                 | 80045           | US             |
| Raffield, Laura         | University of North Carolina                                             | Genetics                  | Chapel Hill             | North Carolina           | 27599           | US             |
| Ramachandran, Vasan S.  | Boston University                                                        |                           | Boston                  | Massachusetts            | 02215           | US             |
| Rao, D.C.               | Washington University in St Louis                                        |                           | St Louis                | Missouri                 | 63130           | US             |

| <b>Name</b>                   | <b>Institution(s)</b>                                                                   | <b>Primary Department</b>                      | <b>Institution City</b> | <b>Institution State</b> | <b>Zip Code</b> | <b>Country</b> |
|-------------------------------|-----------------------------------------------------------------------------------------|------------------------------------------------|-------------------------|--------------------------|-----------------|----------------|
| Rasmussen-Torvik, Laura       | Northwestern University                                                                 |                                                | Chicago                 | Illinois                 | 60208           | US             |
| Ratan, Aakrosh                | University of Virginia                                                                  |                                                | Charlottesville         | Virginia                 | 22903           | US             |
| Redline, Susan                | Brigham & Women's Hospital                                                              |                                                | Boston                  | Massachusetts            | 02115           | US             |
| Reed, Robert                  | University of Maryland                                                                  |                                                | Baltimore               | Maryland                 | 21201           | US             |
| Regan, Elizabeth              | National Jewish Health Fred Hutchinson Cancer Research Center, University of Washington |                                                | Denver                  | Colorado                 | 80206           | US             |
| Reiner, Alex                  | Lutia I Puava Ae Mapu I Fagalele                                                        |                                                | Seattle                 | Washington               | 98109           | US             |
| Reupena, Muagututi 'a Sefuiva | University of Washington                                                                |                                                | Apia                    |                          |                 | WS             |
| Rice, Ken                     | University of Virginia                                                                  |                                                | Seattle                 | Washington               | 98195           | US             |
| Rich, Stephen                 | Vanderbilt University                                                                   | Medicine, Pharmacology, Biomedicla Informatics | Charlottesville         | Virginia                 | 22903           | US             |
| Roden, Dan                    | Broad Institute                                                                         |                                                | Nashville               | Tennessee                | 37235           | US             |
| Roselli, Carolina             | Lundquist Institute                                                                     |                                                | Cambridge               | Massachusetts            | 02142           | US             |
| Rotter, Jerome                | Johns Hopkins University                                                                |                                                | Los Angeles             | California               | 90502           | US             |
| Ruczinski, Ingo               | University of Colorado at Denver                                                        |                                                | Baltimore               | Maryland                 | 21218           | US             |
| Russell, Pamela               | Blood Works Northwest                                                                   |                                                | Denver                  | Colorado                 | 80204           | US             |
| Ruuska, Sarah                 |                                                                                         |                                                | Seattle                 | Washington               | 98107           | US             |

| <b>Name</b>               | <b>Institution(s)</b>               | <b>Primary Department</b>       | <b>Institution City</b> | <b>Institution State</b> | <b>Zip Code</b> | <b>Country</b> |
|---------------------------|-------------------------------------|---------------------------------|-------------------------|--------------------------|-----------------|----------------|
| Ryan, Kathleen            | University of Maryland              |                                 | Baltimore               | Maryland                 | 21201           | US             |
| Sabino, Ester<br>Cerdeira | Universidade de Sao Paulo           | Faculdade de Medicina           | Sao Paulo               |                          | 01310000        | BR             |
| Saleheen, Danish          | Columbia University                 |                                 |                         |                          |                 |                |
| Salimi, Shabnam           | University of Maryland              |                                 | Baltimore               | Maryland                 | 21201           | US             |
| Salzberg, Steven          | Johns Hopkins University            |                                 | Baltimore               | Maryland                 | 21218           | US             |
| Sandow, Kevin             | Lundquist Institute                 | TGPS                            | Torrance                | California               | 90502           | US             |
| Sankaran, Vijay G.        | Broad Institute, Harvard University | Division of Hematology/Oncology | Boston                  | Massachusetts            | 02115           | US             |
| Scheller, Christopher     | University of Michigan              |                                 | Ann Arbor               | Michigan                 | 48109           | US             |
| Schmidt, Ellen            | University of Michigan              |                                 | Ann Arbor               | Michigan                 | 48109           | US             |
| Schwander, Karen          | Washington University in St Louis   |                                 | St Louis                | Missouri                 | 63130           | US             |
| Schwartz, David           | University of Colorado at Denver    |                                 | Denver                  | Colorado                 | 80204           | US             |
| Sciurba, Frank            | University of Pittsburgh            |                                 | Pittsburgh              | Pennsylvania             | 15260           | US             |
| Seidman, Christine        | Harvard Medical School              | Genetics                        | Boston                  | Massachusetts            | 02115           | US             |
| Seidman, Jonathan         | Harvard Medical School              |                                 |                         |                          |                 |                |
| Sheehan, Vivien           | Baylor College of Medicine          | Pediatrics                      | Houston                 | Texas                    | 77030           | US             |
| Sherman, Stephanie L.     | Emory University                    | Human Genetics                  | Atlanta                 | Georgia                  | 30322           | US             |

| <b>Name</b>            | <b>Institution(s)</b>                     | <b>Primary Department</b> | <b>Institution City</b> | <b>Institution State</b> | <b>Zip Code</b> | <b>Country</b> |
|------------------------|-------------------------------------------|---------------------------|-------------------------|--------------------------|-----------------|----------------|
| Shetty, Amol           | University of Maryland                    |                           | Baltimore               | Maryland                 | 21201           | US             |
| Shetty, Aniket         | University of Colorado at Denver          |                           | Denver                  | Colorado                 | 80204           | US             |
| Sheu, Wayne Hui-Heng   | Taichung Veterans General Hospital Taiwan |                           | Taichung City           |                          | 407             | TW             |
| Shoemaker, M. Benjamin | Vanderbilt University                     | Medicine/Cardiology       | Nashville               | Tennessee                | 37212           | US             |
| Silver, Brian          | UMass Memorial Medical Center             |                           | Worcester               | Massachusetts            | 01655           | US             |
| Silverman, Edwin       | Brigham & Women's Hospital                |                           | Boston                  | Massachusetts            | 02115           | US             |
| Smith, Jennifer        | University of Michigan                    |                           | Ann Arbor               | Michigan                 | 48109           | US             |
| Smith, Josh            | University of Washington                  |                           | Seattle                 | Washington               | 98195           | US             |
| Smith, Nicholas        | University of Washington                  | Epidemiology              | Seattle                 | Washington               | 98195           | US             |
| Smith, Tanja           | New York Genome Center                    |                           | New York                | New York                 | 10013           | US             |
| Smoller, Sylvia        | Albert Einstein College of Medicine       |                           | New York                | New York                 | 10461           | US             |
| Snively, Beverly       | Wake Forest Baptist Health                | Biostatistical Sciences   | Winston-Salem           | North Carolina           | 27157           | US             |
| Snyder, Michael        | Stanford University                       |                           |                         |                          |                 |                |
| Sofer, Tamar           | Brigham & Women's Hospital                |                           | Boston                  | Massachusetts            | 02115           | US             |
| Sotoodehnia, Nona      | University of Washington                  |                           | Seattle                 | Washington               | 98195           | US             |

| <b>Name</b>         | <b>Institution(s)</b>                          | <b>Primary Department</b>                                     | <b>Institution City</b> | <b>Institution State</b> | <b>Zip Code</b> | <b>Country</b> |
|---------------------|------------------------------------------------|---------------------------------------------------------------|-------------------------|--------------------------|-----------------|----------------|
| Stilp, Adrienne M.  | University of Washington                       |                                                               | Seattle                 | Washington               | 98195           | US             |
| Storm, Garrett      | University of Colorado at Denver               |                                                               |                         |                          |                 | US             |
| Streeten, Elizabeth | University of Maryland                         |                                                               | Baltimore               | Maryland                 | 21201           | US             |
| Su, Jessica Lasky   | Brigham & Women's Hospital<br>Washington       |                                                               |                         |                          |                 |                |
| Sung, Yun Ju        | University in St Louis                         |                                                               | St Louis                | Missouri                 | 63130           | US             |
| Sylvia, Jody        | Brigham & Women's Hospital                     |                                                               | Boston                  | Massachusetts            | 02115           | US             |
| Szpiro, Adam        | University of Washington                       |                                                               | Seattle                 | Washington               | 98195           | US             |
| Sztalryd, Carole    | University of Maryland                         |                                                               | Baltimore               | Maryland                 | 21201           | US             |
| Taliun, Daniel      | University of Michigan                         |                                                               | Ann Arbor               | Michigan                 | 48109           | US             |
| Tang, Hua           | Stanford University                            | Genetics                                                      | Stanford                | California               | 94305           | US             |
| Taub, Margaret      | Johns Hopkins University                       |                                                               | Baltimore               | Maryland                 | 21218           | US             |
| Taylor, Kent D.     | Lundquist Institute                            | Institute for Translational Genomics and Populations Sciences | Torrance                | California               | 90502           | US             |
| Taylor, Matthew     | University of Colorado Anschutz Medical Campus |                                                               |                         |                          |                 |                |
| Taylor, Simeon      | University of Maryland                         |                                                               | Baltimore               | Maryland                 | 21201           | US             |
| Telen, Marilyn      | Duke University                                |                                                               | Durham                  | North Carolina           | 27708           | US             |
| Thornton,           | University of                                  |                                                               | Seattle                 | Washington               | 98195           | US             |

| <b>Name</b>         | <b>Institution(s)</b>                                      | <b>Primary Department</b>                               | <b>Institution City</b>           | <b>Institution State</b> | <b>Zip Code</b> | <b>Country</b> |
|---------------------|------------------------------------------------------------|---------------------------------------------------------|-----------------------------------|--------------------------|-----------------|----------------|
| Timothy A.          | Washington                                                 |                                                         |                                   |                          |                 |                |
| Threlkeld, Machiko  | University of Washington                                   | University of Washington, Department of Genome Sciences | Seattle                           | Washington               | 98195-5065      | US             |
| Tinker, Lesley      | Fred Hutchinson Cancer Research Center                     |                                                         | Seattle                           | Washington               | 98109           | US             |
| Tirschwell, David   | University of Washington                                   |                                                         | Seattle                           | Washington               | 98195           | US             |
| Tishkoff, Sarah     | University of Pennsylvania                                 | Genetics                                                | Philadelphia                      | Pennsylvania             | 19104           | US             |
| Tiwari, Hemant      | University of Alabama                                      | Biostatistics                                           | Birmingham                        | Alabama                  | 35294           | US             |
| Tong, Catherine     | University of Washington                                   | Department of Biostatistics                             | Seattle                           | Washington               | 98105           | US             |
| Tracy, Russell      | University of Vermont                                      | Pathology & Laboratory Medicine                         | Burlington                        | Vermont                  | 05405           | US             |
| Tsai, Michael       | University of Minnesota                                    |                                                         | Minneapolis                       | Minnesota                | 55455           | US             |
| Vaidya, Dhananjay   | Johns Hopkins University                                   |                                                         | Baltimore                         | Maryland                 | 21218           | US             |
| Van Den Berg, David | University of Southern California                          | USC Methylation Characterization Center                 | University of Southern California | California               | 90033           | US             |
| VandeHaar, Peter    | University of Michigan                                     |                                                         | Ann Arbor                         | Michigan                 | 48109           | US             |
| Vrieze, Scott       | University of Colorado at Boulder, University of Minnesota |                                                         | Boulder                           | Colorado                 | 80309           | US             |
| Walker, Tarik       | University of Colorado at Denver                           |                                                         | Denver                            | Colorado                 | 80204           | US             |
| Wallace, Robert     | University of Iowa                                         |                                                         | Iowa City                         | Iowa                     | 52242           | US             |
| Walts, Avram        | University of                                              |                                                         | Denver                            | Colorado                 | 80204           | US             |



| <b>Name</b>        | <b>Institution(s)</b>                    | <b>Primary Department</b> | <b>Institution City</b> | <b>Institution State</b> | <b>Zip Code</b> | <b>Country</b> |
|--------------------|------------------------------------------|---------------------------|-------------------------|--------------------------|-----------------|----------------|
|                    | Colorado at Denver                       |                           |                         |                          |                 |                |
| Wang, Fei Fei      | University of Washington                 |                           | Seattle                 | Washington               | 98195           | US             |
| Wang, Heming       | Brigham & Women's Hospital, Partners.org |                           |                         |                          |                 |                |
| Watson, Karol      | University of California, Los Angeles    |                           | Los Angeles             | California               | 90095           | US             |
| Weeks, Daniel E.   | University of Pittsburgh                 |                           | Pittsburgh              | Pennsylvania             | 15260           | US             |
| Weir, Bruce        | University of Washington                 |                           | Seattle                 | Washington               | 98195           | US             |
| Weiss, Scott       | Brigham & Women's Hospital               |                           | Boston                  | Massachusetts            | 02115           | US             |
| Weng, Lu-Chen      | Massachusetts General Hospital           |                           | Boston                  | Massachusetts            | 02114           | US             |
| Wessel, Jennifer   | Indiana University                       | Epidemiology              | Indianapolis            | Indiana                  | 46202           |                |
| Willer, Cristen    | University of Michigan                   | Internal Medicine         | Ann Arbor               | Michigan                 | 48109           | US             |
| Williams, Kayleen  | University of Washington                 | Biostatistics             | Seattle                 | Washington               | 98195           | US             |
| Williams, L. Keoki | Henry Ford Health System                 |                           | Detroit                 | Michigan                 | 48202           | US             |
| Wilson, Carla      | Brigham & Women's Hospital               |                           | Boston                  | Massachusetts            |                 | US             |
| Wilson, James      | Beth Israel Deaconess Medical Center     | Cardiology                |                         |                          |                 | US             |
| Wong, Quenna       | University of Washington                 |                           | Seattle                 | Washington               | 98195           | US             |
| Wu, Joseph         | Stanford University                      | Stanford Cardiovascular   | Stanford                | California               | 94305-5454      | US             |

| <b>Name</b>         | <b>Institution(s)</b>                 | <b>Primary Department</b>                                 | <b>Institution City</b> | <b>Institution State</b> | <b>Zip Code</b> | <b>Country</b> |
|---------------------|---------------------------------------|-----------------------------------------------------------|-------------------------|--------------------------|-----------------|----------------|
| Xu, Huichun         | University of Maryland                | Institute                                                 | Baltimore               | Maryland                 | 21201           | US             |
| Yanek, Lisa         | Johns Hopkins University              |                                                           | Baltimore               | Maryland                 | 21218           | US             |
| Yang, Ivana         | University of Colorado at Denver      |                                                           | Denver                  | Colorado                 | 80204           | US             |
| Yang, Rongze        | University of Maryland                |                                                           | Baltimore               | Maryland                 | 21201           | US             |
| Zaghloul, Norann    | University of Maryland                |                                                           | Baltimore               | Maryland                 | 21201           | US             |
| Zekavat, Maryam     | Broad Institute                       |                                                           | Cambridge               | Massachusetts            | 02142           | US             |
| Zhang, Yingze       | University of Pittsburgh              | Medicine                                                  | Pittsburgh              | Pennsylvania             | 15260           | US             |
| Zhao, Snow Xueyan   | National Jewish Health                |                                                           | Denver                  | Colorado                 | 80206           | US             |
| Zhao, Wei           | University of Michigan                | Department of Epidemiology                                | Ann Arbor               | Michigan                 | 48109           | US             |
| Zhi, Degui          | University of Texas Health at Houston |                                                           | Houston                 | Texas                    | 77225           | US             |
| Zhou, Xiang         | University of Michigan                |                                                           | Ann Arbor               | Michigan                 | 48109           | US             |
| Zhu, Xiaofeng       | Case Western Reserve University       | Department of Population and Quantitative Health Sciences | Cleveland               | Ohio                     | 44106           | US             |
| Zody, Michael       | New York Genome Center                |                                                           | New York                | New York                 | 10013           | US             |
| Zoellner, Sebastian | University of Michigan                |                                                           | Ann Arbor               | Michigan                 | 48109           | US             |
